# Supplementary material for: Automated discovery of symbolic laws governing skill acquisition from naturally occurring data
Source: Springer Nature journal article supplement (doi:10.1038/s43588-024-00629-0), 2024-05-24
Supplement: 43588_2024_629_MOESM8_ESM.pdf [file 43588_2024_629_MOESM8_ESM.pdf]

## Image source data file of Extended Data Fig 3

| User Feature    |       |           |                                                                  |
|-----------------|-------|-----------|------------------------------------------------------------------|
| Name            | Abbr. | Data type | Description                                                      |
| Paid            | P     | Disc.     | Has the user subscribed to a paid account?                       |
| Male            | M     | Disc.     | Was male chosen as the user's gender during registration?        |
| Female          | F     | Disc.     | Was female chosen as the user's gender during registration?      |
| Age             | A     | Cont.     | The age that the user specified during registration.             |
| Education Level | E     | Cont.     | The education level that the user specified during registration. |

| Scheduling Feature |       |           |                                                                                                                      |
|--------------------|-------|-----------|----------------------------------------------------------------------------------------------------------------------|
| Name               | Abbr. | Data type | Description                                                                                                          |
| Game Count         | GaC   | Cont.     | The number of times the user has practiced this particular game.                                                     |
| Area Count         | ArC   | Cont.     | The number of times the user has practiced games from the same area as the current game.                             |
| Attribute Count    | AtC   | Cont.     | The number of times the user has practiced games from the same attribute as the current game.                        |
| Game Interval      | Gal   | Cont.     | The time duration elapsed since the last time the user practiced this game.                                          |
| Area Interval      | ArI   | Cont.     | The time duration elapsed since the last time the user practiced a game from the same area as the current game.      |
| Attribute Interval | AtI   | Cont.     | The time duration elapsed since the last time the user practiced a game from the same attribute as the current game. |

| Exercise Feature |       |                        |       |
|------------------|-------|------------------------|-------|
| Skill            | Abbr. | Subskill               | Abbr. |
| General          | GE    | -                      | -     |
| Attention        | AT    | Attentional Deployment | AD_AT |
|                  |       | Divided Attention      | DA_AT |
|                  |       | Field of View          | FV_AT |
|                  |       | Information Processing | IP_AT |
|                  |       | Selective Attention    | SA_AT |
|                  |       | Spatial Orientation    | SO_AT |
|                  |       | Timing                 | TI_AT |
| Flexibility      | FL    | Visualization          | VI_AT |
|                  |       | General Flexibility    | GF_FL |
|                  |       | Response Inhibition    | RI_FL |
| Language         | LA    | Task Switching         | TS_FL |
|                  |       | Reading Comprehension  | RC_LA |
|                  |       | Verbal Fluency         | VF_LA |
| Math             | MA    | Vocabulary Proficiency | VP_LA |
|                  |       | General Math           | GM_MA |
| Memory           | ME    | Numerical Calculation  | NC_MA |
|                  |       | Divided Attention      | DA_ME |
|                  |       | Face-Name Recall       | FR_ME |
|                  |       | Field of View          | FV_ME |
|                  |       | Information Processing | IP_ME |
|                  |       | Spatial Recall         | SR_ME |
| Reasoning        | RE    | Working Memory         | WM_ME |
|                  |       | Logical Reasoning      | LR_RE |
|                  |       | Planning               | PL_RE |
|                  |       | Spatial Reasoning      | SR_RE |
